# Supplementary material for: Changes in bee (Hymenoptera: Anthophila) diversity during forest stand succession after final felling
Source: Research Square preprint supplement (doi:10.21203/rs.3.rs-5042501/v1), 2025-09-01
Supplement: Supplementary file 1 [file 35143e6bc9e2ef93fd7305c0.docx]

Supplementary material for:

**Changes in bee (Hymenoptera: Anthophila) diversity during forest stand succession after final felling**

**Journal of Insect Conservation**

**Authors:**

Betija Rubene1,2, Jānis Gailis2, Rūta Starka1, Andris Avotins1

Corresponding author – Betija Rubene,betija.rubene@lbtu.lv

**Institutional Affiliation:**

1 University of Latvia, Faculty of Medicine and Life Sciences, Riga, Latvia

2 Latvia University of Life Sciences and Technologies, Institute of Plant Protection Research "Agrihorts", Jelgava, Latvia

**Table S1**

Coordinates of pan trap placement. Size group: S – small, L – large. Age group “1-2” does not have an assigned size group, because the size group was determined by the median of each age group.

| **Age group** | **Size group** | **Longitude** | **Latitude** |
| --- | --- | --- | --- |
| 1-2 | - | 23.86037 | 56.58974 |
| 3-6 | S | 23.86345 | 56.59060 |
| 3-6 | S | 23.86292 | 56.58685 |
| 3-6 | S | 23.45449 | 56.73956 |
| 3-6 | S | 23.43674 | 56.65107 |
| 3-6 | S | 23.45576 | 56.76771 |
| 3-6 | L | 23.45970 | 56.75920 |
| 3-6 | L | 23.39947 | 56.76221 |
| 3-6 | L | 23.43282 | 56.71270 |
| 3-6 | L | 23.62569 | 56.68385 |
| 7-10 | S | 23.42049 | 56.74154 |
| 7-10 | S | 23.59492 | 56.66122 |
| 7-10 | S | 23.61694 | 56.71694 |
| 7-10 | S | 23.62284 | 56.70741 |
| 7-10 | L | 23.41216 | 56.75520 |
| 7-10 | L | 23.43184 | 56.75933 |
| 7-10 | L | 23.59840 | 56.69908 |
| 7-10 | L | 23.46195 | 56.76061 |
| 7-10 | L | 23.39596 | 56.72817 |
| 11-20 | S | 23.59047 | 56.65598 |
| 11-20 | S | 23.63189 | 56.61132 |
| 11-20 | S | 23.59820 | 56.69018 |
| 11-20 | S | 23.84442 | 56.60132 |
| 11-20 | L | 23.55438 | 56.73965 |
| 11-20 | L | 23.55590 | 56.69229 |
| 11-20 | L | 23.46382 | 56.75105 |
| 11-20 | L | 23.42523 | 56.74219 |
| 11-20 | L | 23.85461 | 56.59778 |
| 11-20 | L | 23.53945 | 56.69773 |
| 11-20 | L | 23.51036 | 56.65858 |
| 21-30 | S | 23.62583 | 56.61477 |
| 21-30 | S | 23.40415 | 56.71479 |
| 21-30 | S | 23.47398 | 56.73066 |
| 21-30 | S | 23.91649 | 56.60319 |
| 21-30 | L | 23.63117 | 56.72295 |
| 21-30 | L | 23.41108 | 56.75665 |
| 21-30 | L | 23.52282 | 56.63430 |
| 21-30 | L | 23.40323 | 56.75760 |

**Table S2**

GAMMs with different parametrisation in fixed parts of the model.

| **Factor combination** | **Degrees of freedom** | **AICc** |
| --- | --- | --- |
| s(age) + s(area) | 8 | 56.150 |
| s(age) + area | 7 | 53.631 |
| s(age, area) | 7 | 53.058 |

**Table S3**

GAMs evaluated after using the “dredge” function on models with the formula:

gam(log1p(bee_div) ~ s(Age,Area) + fl_div + fl_cov + Lysimachia + Campanula

| **N.** | **(Intercept)** | **Camp.** | **fl_cov** | **fl_div** | **Lysim.** | **s(Age, Area)** | **df** | **AICc** | **delta** |
| --- | --- | --- | --- | --- | --- | --- | --- | --- | --- |
| 1 | 0.210 | NA | NA | 0.467 | NA | + | 8 | 17.165 | 0.000 |
| 2 | 0.219 | -0.925 | NA | 0.468 | NA | + | 9 | 19.993 | 2.829 |
| 3 | 0.206 | NA | 0.032 | 0.446 | NA | + | 8 | 20.057 | 2.892 |
| 4 | 0.207 | NA | NA | 0.452 | 0.061 | + | 8 | 20.112 | 2.947 |
| 5 | 0.216 | -0.859 | NA | 0.455 | 0.055 | + | 10 | 23.217 | 6.052 |
| 6 | 0.214 | -0.801 | 0.027 | 0.450 | NA | + | 10 | 23.232 | 6.067 |
| 7 | 0.168 | NA | NA | 0.558 | NA | NA | 3 | 27.455 | 10.290 |
| 8 | 0.164 | NA | NA | 0.497 | 0.214 | NA | 3 | 27.511 | 10.346 |
| 9 | 0.157 | NA | 0.085 | 0.499 | NA | NA | 4 | 28.147 | 10.982 |
| 10 | 0.163 | 0.950 | NA | 0.547 | NA | NA | 3 | 29.635 | 12.470 |
| 11 | 0.158 | 0.974 | NA | 0.486 | 0.214 | NA | 4 | 29.805 | 12.640 |
| 12 | 0.151 | 1.089 | 0.087 | 0.485 | NA | NA | 4 | 30.362 | 13.197 |
| 13 | 0.357 | NA | 0.156 | NA | NA | + | 7 | 39.487 | 22.322 |
| 14 | 0.381 | NA | NA | NA | 0.304 | + | 8 | 41.200 | 24.035 |
| 15 | 0.427 | NA | NA | NA | NA | + | 7 | 42.477 | 25.312 |
| 16 | 0.358 | -0.007 | 0.154 | NA | NA | + | 9 | 42.929 | 25.764 |
| 17 | 0.387 | -0.495 | NA | NA | 0.297 | + | 9 | 44.796 | 27.631 |
| 18 | 0.434 | -0.773 | NA | NA | NA | + | 9 | 45.763 | 28.599 |
| 19 | 0.319 | NA | 0.240 | NA | NA | NA | 3 | 47.018 | 29.853 |
| 20 | 0.347 | NA | NA | NA | 0.525 | NA | 3 | 47.349 | 30.185 |
| 21 | 0.291 | 2.939 | 0.235 | NA | NA | NA | 3 | 47.584 | 30.419 |
| 22 | 0.322 | 2.718 | NA | NA | 0.508 | NA | 3 | 48.222 | 31.057 |
| 23 | 0.427 | NA | NA | NA | NA | NA | 2 | 54.242 | 37.077 |
| 24 | 0.393 | 3.277 | NA | NA | NA | NA | 2 | 54.719 | 37.554 |

**Abbrevations:**

fl_div – Shannon-Weiner diversity of flowering plants;

Camp. – Campanula genus flower cover (%);

Lysim. – Lysimachia genus flower cover (%);

fl_cover – flower cover (%);

Df – degrees of freedom.

**Table S4**

GAMs evaluated after using the “dredge” function on models with the formula:

gam(log1p(bee_div) ~ s(Age) + Area + fl_div + fl_cov + Lysimachia + Campanula

| **N.** | **(Intercept)** | **Area** | **Camp.** | **fl_cov** | **fl_div** | **Lysim.** | **s(Age)** | **df** | **AICc** | **delta** |
| --- | --- | --- | --- | --- | --- | --- | --- | --- | --- | --- |
| 1 | 0.200 | NA | NA | NA | 0.488 | NA | + | 5 | 16.049 | 0.000 |
| 2 | 0.127 | 0.040 | NA | NA | 0.461 | NA | + | 6 | 16.868 | 0.819 |
| 3 | 0.197 | NA | NA | NA | 0.458 | 0.111 | + | 6 | 18.009 | 1.960 |
| 4 | 0.194 | NA | NA | 0.047 | 0.457 | NA | + | 6 | 18.180 | 2.132 |
| 5 | 0.207 | NA | -0.792 | NA | 0.490 | NA | + | 6 | 18.297 | 2.249 |
| 6 | 0.135 | 0.041 | -1.025 | NA | 0.464 | NA | + | 7 | 19.199 | 3.151 |
| 7 | 0.124 | 0.039 | NA | 0.043 | 0.432 | NA | + | 7 | 19.306 | 3.258 |
| 8 | 0.132 | 0.036 | NA | NA | 0.439 | 0.087 | + | 7 | 19.383 | 3.334 |
| 9 | 0.204 | NA | -0.737 | NA | 0.461 | 0.109 | + | 7 | 20.469 | 4.421 |
| 10 | 0.200 | NA | -0.631 | 0.044 | 0.460 | NA | + | 7 | 20.728 | 4.680 |
| 11 | 0.139 | 0.037 | -0.964 | NA | 0.443 | 0.085 | + | 8 | 21.935 | 5.886 |
| 12 | 0.130 | 0.039 | -0.880 | 0.040 | 0.436 | NA | + | 8 | 21.953 | 5.904 |
| 13 | 0.168 | NA | NA | NA | 0.558 | NA | NA | 3 | 27.455 | 11.406 |
| 14 | 0.164 | NA | NA | NA | 0.497 | 0.214 | NA | 3 | 27.511 | 11.462 |
| 15 | 0.157 | NA | NA | 0.085 | 0.499 | NA | NA | 4 | 28.147 | 12.098 |
| 16 | 0.163 | NA | 0.950 | NA | 0.547 | NA | NA | 3 | 29.635 | 13.586 |
| 17 | 0.136 | 0.018 | NA | NA | 0.544 | NA | NA | 4 | 29.667 | 13.618 |
| 18 | 0.158 | NA | 0.974 | NA | 0.486 | 0.214 | NA | 4 | 29.805 | 13.756 |
| 19 | 0.137 | 0.015 | NA | NA | 0.487 | 0.210 | NA | 5 | 29.936 | 13.887 |
| 20 | 0.151 | NA | 1.089 | 0.087 | 0.485 | NA | NA | 4 | 30.362 | 14.313 |
| 21 | 0.122 | 0.020 | NA | 0.087 | 0.483 | NA | NA | 4 | 30.425 | 14.377 |
| 22 | 0.134 | 0.016 | 0.885 | NA | 0.536 | NA | NA | 5 | 32.039 | 15.990 |
| 23 | 0.134 | 0.014 | 0.918 | NA | 0.477 | 0.211 | NA | 5 | 32.433 | 16.385 |
| 24 | 0.119 | 0.018 | 1.018 | 0.089 | 0.471 | NA | NA | 6 | 32.858 | 16.809 |
| 25 | 0.209 | 0.068 | NA | 0.157 | NA | NA | + | 7 | 37.675 | 21.626 |
| 26 | 0.350 | NA | NA | 0.172 | NA | NA | + | 6 | 38.159 | 22.111 |
| 27 | 0.371 | NA | NA | NA | NA | 0.368 | + | 6 | 38.912 | 22.864 |
| 28 | 0.247 | 0.061 | NA | NA | NA | 0.314 | + | 7 | 39.274 | 23.225 |
| 29 | 0.216 | 0.069 | -0.640 | 0.155 | NA | NA | + | 8 | 40.708 | 24.659 |
| 30 | 0.254 | 0.080 | NA | NA | NA | NA | + | 6 | 41.025 | 24.977 |
| 31 | 0.355 | NA | -0.482 | 0.170 | NA | NA | + | 7 | 41.029 | 24.981 |
| 32 | 0.380 | NA | -0.865 | NA | NA | 0.364 | + | 7 | 41.685 | 25.637 |
| 33 | 0.257 | 0.061 | -0.979 | NA | NA | 0.310 | + | 8 | 42.224 | 26.175 |
| 34 | 0.427 | NA | NA | NA | NA | NA | + | 5 | 42.334 | 26.285 |
| 35 | 0.264 | 0.081 | -1.075 | NA | NA | NA | + | 7 | 43.695 | 27.646 |
| 36 | 0.436 | NA | -0.907 | NA | NA | NA | + | 6 | 44.903 | 28.854 |
| 37 | 0.319 | NA | NA | 0.240 | NA | NA | NA | 3 | 47.018 | 30.969 |
| 38 | 0.187 | 0.064 | NA | 0.230 | NA | NA | NA | 4 | 47.041 | 30.992 |
| 39 | 0.347 | NA | NA | NA | NA | 0.525 | NA | 3 | 47.349 | 31.301 |
| 40 | 0.291 | NA | 2.939 | 0.235 | NA | NA | NA | 3 | 47.584 | 31.535 |
| 41 | 0.233 | 0.055 | NA | NA | NA | 0.490 | NA | 3 | 48.030 | 31.981 |
| 42 | 0.176 | 0.057 | 2.548 | 0.226 | NA | NA | NA | 5 | 48.176 | 32.127 |
| 43 | 0.322 | NA | 2.718 | NA | NA | 0.508 | NA | 3 | 48.222 | 32.173 |
| 44 | 0.223 | 0.050 | 2.400 | NA | NA | 0.478 | NA | 5 | 49.375 | 33.326 |
| 45 | 0.264 | 0.076 | NA | NA | NA | NA | NA | 3 | 53.831 | 37.783 |
| 46 | 0.427 | NA | NA | NA | NA | NA | NA | 2 | 54.242 | 38.193 |
| 47 | 0.393 | NA | 3.277 | NA | NA | NA | NA | 2 | 54.719 | 38.671 |
| 48 | 0.251 | 0.068 | 2.794 | NA | NA | NA | NA | 3 | 54.893 | 38.845 |

**Abbrevations:**

fl_div – Shannon-Weiner diversity of flowering plants;

Camp. – Campanula genus flower cover (%);

Lysim. – Lysimachia genus flower cover (%);

fl_cover – flower cover (%);

Df – degrees of freedom.

**Table S5**

GAMs evaluated after using the “dredge” function on models with the formula:

gam(log1p(bee_div) ~ s(Age) + s(Area) + fl_div + fl_cov + Lysimachia + Campanula

| **N.** | **(Intercept)** | **Camp.** | **fl_cov** | **fl_div** | **Lysim.** | **s(Age)** | **s(Area)** | **df** | **AICc** | **delta** |
| --- | --- | --- | --- | --- | --- | --- | --- | --- | --- | --- |
| 1 | 0.200 | NA | NA | 0.488 | NA | + | NA | 5 | 16.049 | 0.000 |
| 2 | 0.213 | NA | NA | 0.461 | NA | + | + | 6 | 16.868 | 0.819 |
| 3 | 0.197 | NA | NA | 0.458 | 0.111 | + | NA | 6 | 18.009 | 1.960 |
| 4 | 0.194 | NA | 0.047 | 0.457 | NA | + | NA | 6 | 18.180 | 2.132 |
| 5 | 0.207 | -0.792 | NA | 0.490 | NA | + | NA | 6 | 18.297 | 2.249 |
| 6 | 0.222 | -1.025 | NA | 0.464 | NA | + | + | 7 | 19.199 | 3.151 |
| 7 | 0.207 | NA | 0.043 | 0.432 | NA | + | + | 7 | 19.306 | 3.258 |
| 8 | 0.209 | NA | NA | 0.439 | 0.087 | + | + | 7 | 19.383 | 3.334 |
| 9 | 0.204 | -0.737 | NA | 0.461 | 0.109 | + | NA | 7 | 20.469 | 4.421 |
| 10 | 0.200 | -0.631 | 0.044 | 0.460 | NA | + | NA | 7 | 20.728 | 4.680 |
| 11 | 0.218 | -0.964 | NA | 0.443 | 0.085 | + | + | 8 | 21.935 | 5.886 |
| 12 | 0.215 | -0.880 | 0.040 | 0.436 | NA | + | + | 8 | 21.953 | 5.904 |
| 13 | 0.168 | NA | NA | 0.558 | NA | NA | NA | 3 | 27.455 | 11.406 |
| 14 | 0.164 | NA | NA | 0.497 | 0.214 | NA | NA | 3 | 27.511 | 11.462 |
| 15 | 0.157 | NA | 0.085 | 0.499 | NA | NA | NA | 4 | 28.147 | 12.098 |
| 16 | 0.163 | 0.950 | NA | 0.547 | NA | NA | NA | 3 | 29.635 | 13.586 |
| 17 | 0.174 | NA | NA | 0.544 | NA | NA | + | 4 | 29.667 | 13.618 |
| 18 | 0.158 | 0.974 | NA | 0.486 | 0.214 | NA | NA | 4 | 29.805 | 13.756 |
| 19 | 0.171 | NA | NA | 0.475 | 0.233 | NA | + | 6 | 30.357 | 14.309 |
| 20 | 0.151 | 1.089 | 0.087 | 0.485 | NA | NA | NA | 4 | 30.362 | 14.313 |
| 21 | 0.164 | NA | 0.087 | 0.483 | NA | NA | + | 5 | 30.425 | 14.377 |
| 22 | 0.169 | 0.885 | NA | 0.536 | NA | NA | + | 5 | 32.039 | 15.990 |
| 23 | 0.158 | 1.018 | 0.089 | 0.471 | NA | NA | + | 6 | 32.858 | 16.809 |
| 24 | 0.168 | 0.509 | NA | 0.471 | 0.231 | NA | + | 7 | 33.254 | 17.205 |
| 25 | 0.356 | NA | 0.157 | NA | NA | + | + | 7 | 37.675 | 21.626 |
| 26 | 0.350 | NA | 0.172 | NA | NA | + | NA | 6 | 38.159 | 22.111 |
| 27 | 0.371 | NA | NA | NA | 0.368 | + | NA | 6 | 38.912 | 22.864 |
| 28 | 0.379 | NA | NA | NA | 0.314 | + | + | 7 | 39.274 | 23.225 |
| 29 | 0.364 | -0.640 | 0.155 | NA | NA | + | + | 8 | 40.708 | 24.659 |
| 30 | 0.427 | NA | NA | NA | NA | + | + | 6 | 41.025 | 24.977 |
| 31 | 0.355 | -0.482 | 0.170 | NA | NA | + | NA | 7 | 41.029 | 24.981 |
| 32 | 0.380 | -0.865 | NA | NA | 0.364 | + | NA | 7 | 41.685 | 25.637 |
| 33 | 0.390 | -0.979 | NA | NA | 0.310 | + | + | 8 | 42.224 | 26.175 |
| 34 | 0.427 | NA | NA | NA | NA | + | NA | 5 | 42.334 | 26.285 |
| 35 | 0.438 | -1.075 | NA | NA | NA | + | + | 7 | 43.695 | 27.646 |
| 36 | 0.436 | -0.907 | NA | NA | NA | + | NA | 6 | 44.903 | 28.854 |
| 37 | 0.319 | NA | 0.240 | NA | NA | NA | NA | 3 | 47.018 | 30.969 |
| 38 | 0.324 | NA | 0.230 | NA | NA | NA | + | 4 | 47.041 | 30.992 |
| 39 | 0.347 | NA | NA | NA | 0.525 | NA | NA | 3 | 47.349 | 31.301 |
| 40 | 0.291 | 2.939 | 0.235 | NA | NA | NA | NA | 3 | 47.584 | 31.535 |
| 41 | 0.299 | 2.548 | 0.226 | NA | NA | NA | + | 5 | 48.176 | 32.127 |
| 42 | 0.322 | 2.718 | NA | NA | 0.508 | NA | NA | 3 | 48.222 | 32.173 |
| 43 | 0.349 | NA | NA | NA | 0.510 | NA | + | 5 | 48.297 | 32.249 |
| 44 | 0.330 | 2.400 | NA | NA | 0.478 | NA | + | 5 | 49.375 | 33.326 |
| 45 | 0.427 | NA | NA | NA | NA | NA | + | 3 | 53.831 | 37.783 |
| 46 | 0.427 | NA | NA | NA | NA | NA | NA | 2 | 54.242 | 38.193 |
| 47 | 0.393 | 3.277 | NA | NA | NA | NA | NA | 2 | 54.719 | 38.671 |
| 48 | 0.398 | 2.794 | NA | NA | NA | NA | + | 4 | 54.893 | 38.845 |

**Abbrevations:**

fl_div – Shannon-Weiner diversity of flowering plants;

Camp. – Campanula genus flower cover (%);

Lysim. – Lysimachia genus flower cover (%);

fl_cover – flower cover (%);

Df – degrees of freedom.

**Table S6**

List of species, number of individuals caught, species nesting and lectism specifications (Rasmont et al. 2021; Westrich 2018).

| Species | Individuals | Nesting | Lectism |
| --- | --- | --- | --- |
| **Andrenidae** | | | |
| *Andrena bicolor* Fabricius, 1775 | 1 | Ground | Polylectic |
| *Andrena fulvida* Schenck, 1853 | 2 | Ground | Polylectic |
| *Andrena minutula* (Kirby, 1802) | 1 | Ground | Polylectic |
| *Andrena subopaca* Nylander, 1848 | 1 | Ground | Polylectic |
| **Apidae** | | | |
| *Antophora furcata* (Panzer, 1798) | 2 | Cavity | Polylectic |
| *Apis mellifera* Linnaeus, 1758 | 90 | Domesticated, in nature mostly cavity | Polylectic |
| *Bombus bohemicus* (Seidl, 1837) | 9 | Cleptoparasitic (on *B. lucorum*) | - |
| *Bombus campestris* (Panzer, 1801) | 1 | Cleptoparasitic (mainly on *B. pascuorum*) | - |
| *Bombus hortorum* (Linnaeus, 1761) | 2 | Cavity – above/below ground | Polylectic |
| *Bombus humilis* Illiger, 1806 | 1 | Epigeic – above ground | Polylectic |
| *Bombus hypnorum* (Linnaeus, 1758) | 2 | Cavity – above ground | Polylectic |
| *Bombus lapidarius* (Linnaeus, 1758) | 2 | Cavity – above ground | Polylectic |
| *Bombus lucorum* (Linnaeus, 1761) | 29 | Cavity – below ground | Polylectic |
| *Bombus pascuorum* (Scopoli, 1763) | 11 | Cavity/epigeic – above/below ground | Polylectic |
| *Bombus pratorum* (Linnaeus, 1761) | 7 | Cavity/epigeic – above/below ground | Polylectic |
| *Bombus ruderarius* (Müller, 1776) | 1 | Epigeic – above ground | Polylectic |
| *Bombus schrencki* Morawitz, 1881 | 3 | Epigeic -above ground | Polylectic |
| *Bombus soroeensis* (Fabricius, 1777) | 4 | Cavity – below ground | Polylectic |
| *Bombus sylvarum* (Linnaeus, 1761) | 1 | Cavity/epigeic – above/below ground | Polylectic |
| *Bombus sylvestris* (Lepeletier, 1832) | 5 | Cleptoparasitic (on *B. pratorum*) | - |
| *Bombus terrestris*  (Linnaeus, 1758) | 6 | Cavity – below ground | Polylectic |
| *Ceratina cyanea* (Kirby, 1802) | 1 | Cavity | Polylectic |
| *Epeoloides coecutiens* (Fabricius, 1775) | 3 | Cleptoparasitic (on *Macropis* spp.) | - |
| *Eucera longicornis* (Linnaeus, 1758) | 1 | Ground | Oligolectic: Fabaceae |
| **Colletidae** | | | |
| *Collettes marginatus* Smith, 1846 | 1 | Ground | Polylectic |
| *Hylaeus annulatus* (Linnaeus, 1758) | 14 | Cavity | Polylectic |
| *Hylaeus brevicornis* Nylander, 1852 | 4 | Cavity | Polylectic |
| *Hylaeus communis* Nylander, 1852 | 11 | Cavity | Polylectic |
| *Hylaeus confusus* Nylander, 1852 | 27 | Cavity | Polylectic |
| *Hylaeus gibbus* Forster, 1871 | 96 | Cavity | Polylectic |
| *Hylaeus nigritus* (Fabricius, 1798) | 10 | Cavity | Polylectic |
| *Hylaeus pectoralis* Förster,1871 | 3 | Cavity | Polylectic |
| *Hylaeus rinki* (Gorski, 1852) | 6 | Cavity | Polylectic |
| **Halictidae** | | | |
| *Halictus subauratus* (Rossi, 1792) | 1 | Ground | Polylectic |
| *Lasioglossum albipes* (Fabricius, 1781) | 3 | Ground | Polylectic |
| *Lasioglossum calceatum* (Scopoli, 1763) | 5 | Ground | Polylectic |
| *Lasioglossum fulvicorne* (Kirby, 1802) | 1 | Ground | Polylectic |
| *Lasioglossum laticeps* (Schenck, 1869) | 1 | Ground | Polylectic |
| *Lasioglossum morio* (Fabricius, 1793) | 3 | Ground | Polylectic |
| *Lasioglossum pauxillum* (Schenck, 1853) | 2 | Ground | Polylectic |
| *Lasioglossum zonulum* (Smith, F., 1848) | 6 | Ground | Polylectic |
| *Rophites quinquespinosus* Spinola, 1808 | 1 | Ground | Oligolectic: Lamiaceae |
| *Sphecodes ephippius* (Linnaeus, 1767) | 1 | Cleptoparasitic (on *Andrena* spp., *Halictus* spp., *Lasioglossum* spp.) | - |
| **Megachilidae** | | | |
| *Chelostoma campanularum* (Kirby 1802) | 7 | Cavity | Oligolectic – Campanulaceae, |
| *Chelostoma rapunculi* (Lepeletier, 1841) | 2 | Cavity | Oligolectic - Campanulaceae |
| *Coelioxys rufescens* Lepeletier & Serville,1825 | 1 | Cleptoparasitic (on *Anthophora* spp.) | - |
| *Megachile centuncularis* (Linnaeus, 1758) | 1 | Cavity | Polylectic |
| *Megachile circumcincta* (Kirby, 1802) | 1 | Mostly cavity | Polylectic |
| *Megachile lapponica* Thomson, 1872 | 1 | Cavity | Oligolectic: *Epilobium* |
| *Megachile ligniseca* (Kirby, 1802) | 21 | Cavity | Polylectic |
| *Megachile willughbiella* (Kirby, 1802) | 2 | Mostly cavity | Polylectic |

| **Melittidae** | | | |
| --- | --- | --- | --- |
| *Dasypoda hirtipes* (Fabricius, 1793) | 82 | Ground | Oligolectic:  Asteraceae |
| *Macropis europaea* Warncke, 1973 | 5 | Ground | Oligolectic: *Lysimachia* |
| *Macropis fulvipes* (Fabricius, 1804) | 1 | Ground | Oligolectic: *Lysimachia* |
